# Supplementary material for: Photodegradation Behavior of Agricultural Antibiotic Oxytetracycline in Water
Source: MDPI journal article supplement (doi:10.3390/w14213379), 2022-10-25
Supplement: s1 [file s1]

## Supplementary Information

### Photodegradation behavior of agricultural antibiotic oxytetracycline in water

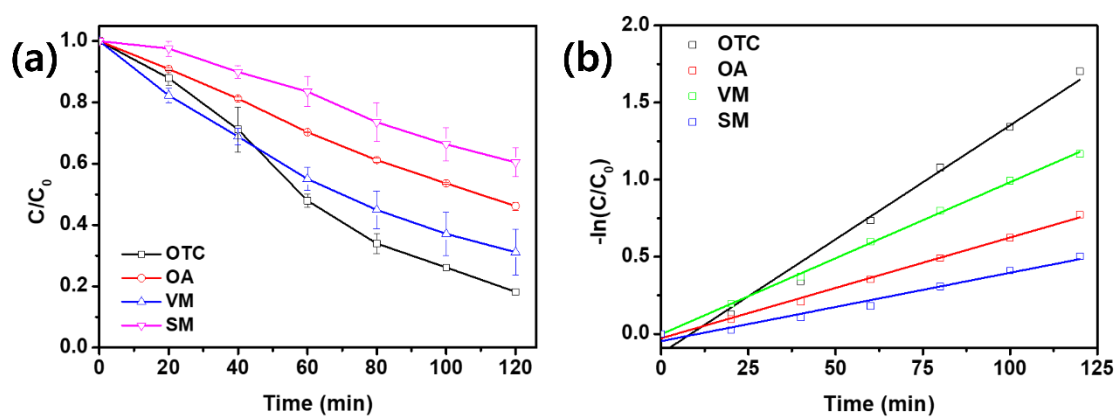

**Figure S1.** (a) Comparison of the degradation efficiencies of four agricultural antibiotics and (b) pseudo-first-order kinetic plots for the four agricultural antibiotics.

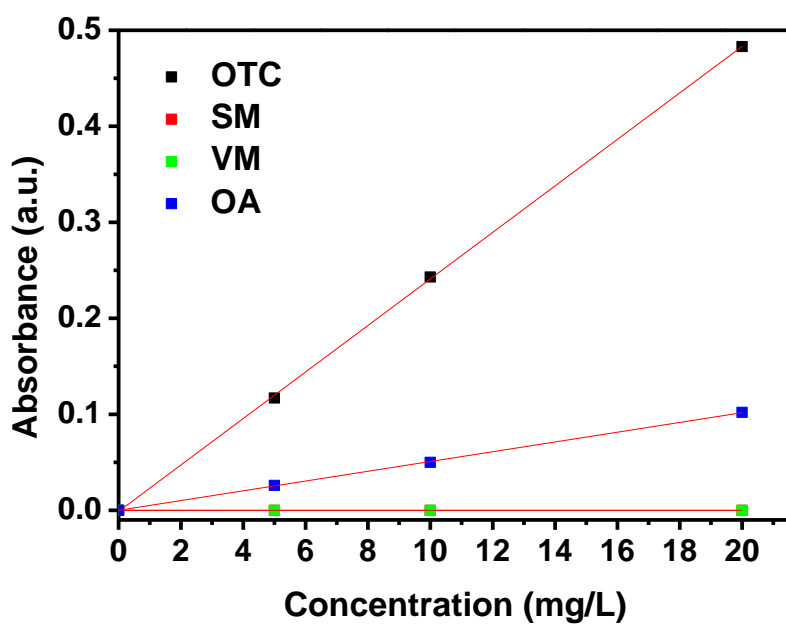

**Figure S2.** Measured absorbances of the antibiotics at different concentrations for determination of their extinction coefficients.

**Table S1** Characteristics of actual agricultural water.

| Parameters                |               |                |               |                                    |                                                                   |               |               |                           |
|---------------------------|---------------|----------------|---------------|------------------------------------|-------------------------------------------------------------------|---------------|---------------|---------------------------|
|                           | pH            | COD<br>(mg/L)  | DO<br>(mg/L)  | OTC<br>concent<br>ration<br>(mg/L) | Electric<br>al<br>conduct<br>ivity<br>( $\mu\text{S}/\text{cm}$ ) | T-N<br>(mg/L) | T-P<br>(mg/L) | Cl <sup>-</sup><br>(mg/L) |
| Agricul<br>tural<br>water | $8.6 \pm 0.2$ | $31.5 \pm 2.5$ | $7.6 \pm 0.0$ | N.D                                | $319 \pm 10$                                                      | N.D           | N.D           | $7.8 \pm 1.4$             |

**Table S2.** Determined molar extinction coefficients of the four agricultural antibiotics.

| Antibiotic | Molar extinction coefficient ( $\text{M}^{-1} \text{cm}^{-1}$ ) |
|------------|-----------------------------------------------------------------|
| OTC        | 11,141                                                          |
| SM         | 0                                                               |
| VM         | 0                                                               |
| OA         | 1,328                                                           |
